# Supplementary material for: Effects of Metal Ions, Temperature, and a Denaturant on the Oxidative Folding Pathways of Bovine α-Lactalbumin
Source: Int J Mol Sci. 2017 Sep 16;18(9):1996. doi: 10.3390/ijms18091996 (PMC5618645; doi:10.3390/ijms18091996)
Supplement: Supplementary file 1 [file ijms-18-01996-s001.pdf]

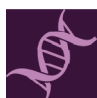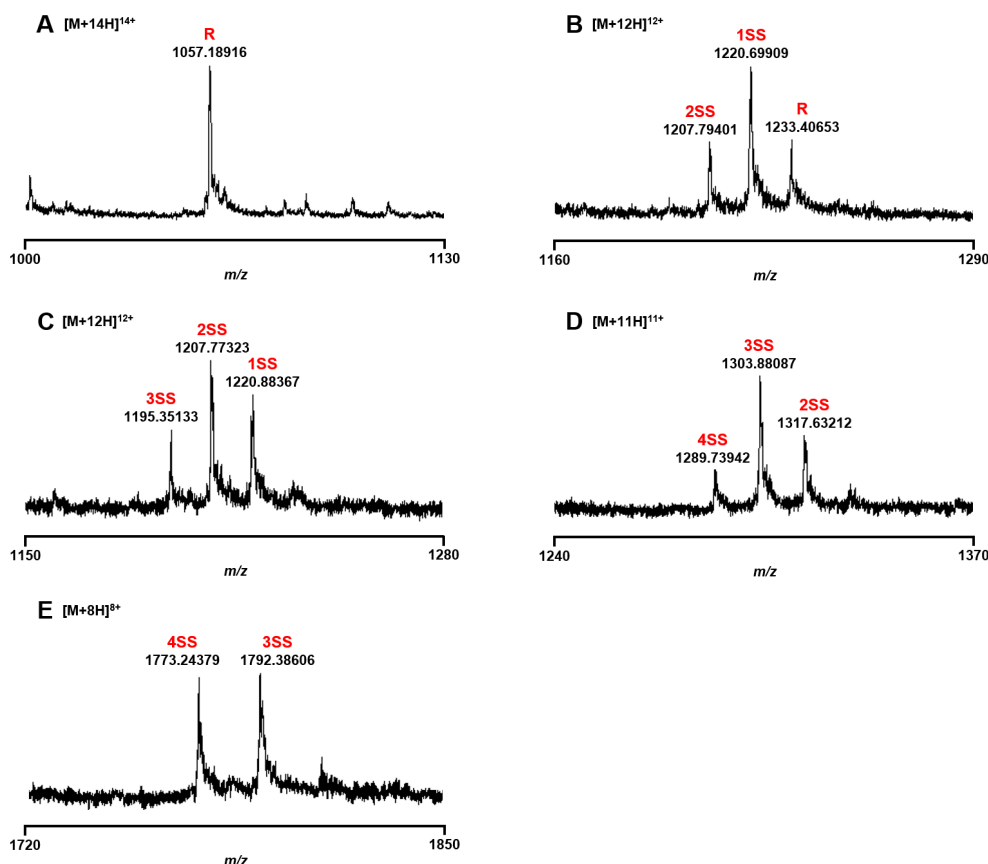

**Figure S1.** ESI mass spectra of the SS intermediates generated by the reaction of  $\alpha$ LA with DHS<sup>ox</sup>. The reaction was carried out in Tris-HCl buffer (pH 8.0) containing 2 mM EDTA. After 1 min, the reaction was quenched by AEMTS. The samples obtained were analyzed with the ESI(+) mode. (A) R; (B) 1 eq DHS<sup>ox</sup> was added to R; (C) 2 eq DHS<sup>ox</sup> was added to R; (D) 3 eq DHS<sup>ox</sup> was added to R; (E) 4 eq DHS<sup>ox</sup> was added to R.

**Table S1.** Assignment of the peaks observed in Figure S1. <sup>a</sup>

| Species          | Expected M <sup>+</sup> | [M+8H] <sup>8+</sup>      | [M+11H] <sup>11+</sup>    | [M+12H] <sup>12+</sup>                  | [M+14H] <sup>14+</sup>    |
|------------------|-------------------------|---------------------------|---------------------------|-----------------------------------------|---------------------------|
| R + 8×AEMTS      | 14784.9862              |                           |                           | 1233.40653<br>(1233.0899)               | 1057.18916<br>(1057.0782) |
| 1SS +<br>6×AEMTS | 14632.9420              |                           |                           | 1220.69909<br>1220.88367<br>(1220.4196) |                           |
| 2SS +<br>4×AEMTS | 14480.8978              |                           | 1317.63212<br>(1317.4530) | 1207.79401<br>1207.77323<br>(1207.7492) |                           |
| 3SS +<br>2×AEMTS | 14328.8536              | 1792.38606<br>(1792.1144) | 1303.88087<br>(1303.6308) | 1195.35133<br>(1195.0789)               |                           |
| 4SS              | 14176.8094              | 1773.24379<br>(1773.1089) | 1289.73942<br>(1289.8086) |                                         |                           |

<sup>a</sup> The calculated mass numbers are shown in parentheses.

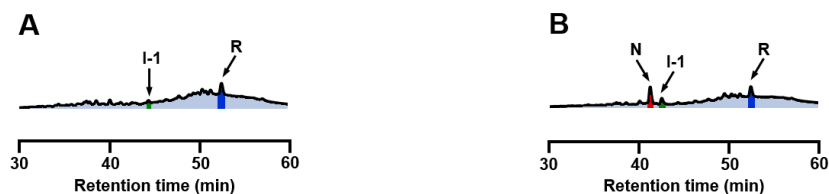

**Figure S2.** RP-HPLC chromatograms obtained by the oxidation of R (10  $\mu$ M) with 1 eq DHS<sup>ox</sup> at pH 6.8 and 5  $^{\circ}$ C in the absence of EDTA. The reaction was acid-quenched after 20 h. For HPLC analysis conditions, see the experimental section. (A) In the absence of CaCl<sub>2</sub>; (B) In the presence of 5 mM CaCl<sub>2</sub>.

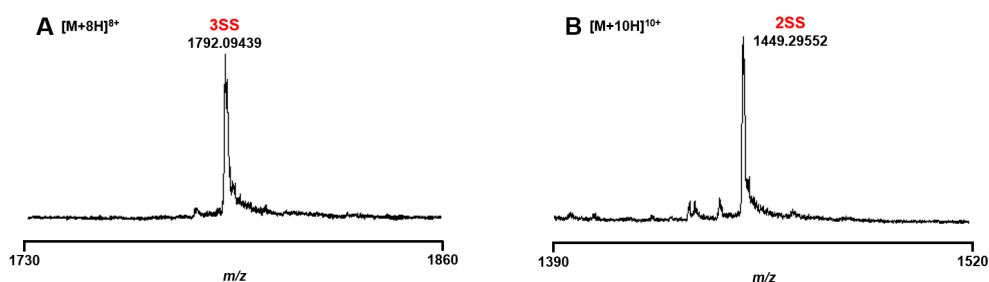

**Figure S3.** ESI mass spectra of I-1 and I-2 quenched by AEMTS. (A) I-1; (B) I-2.

**Table S2.** Assignment of the peaks observed in Figure S3. <sup>a</sup>

|                        | Expected M <sup>+</sup> | [M+8H] <sup>8+</sup>      | [M+10H] <sup>10+</sup>    |
|------------------------|-------------------------|---------------------------|---------------------------|
| I-1 (3SS) +<br>2×AEMTS | 14328.8536              | 1792.09439<br>(1792.1144) |                           |
| I-2 (2SS) +<br>4×AEMTS | 14480.8978              |                           | 1449.29552<br>(1449.0975) |

<sup>a</sup> The calculated mass numbers are shown in parentheses.

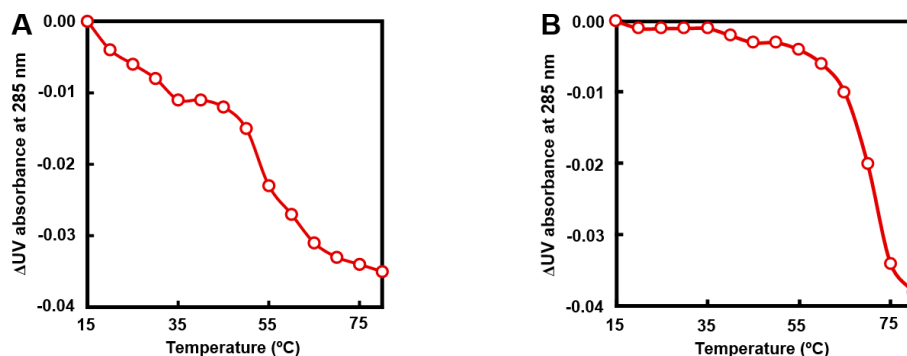

**Figure S4.** The thermal denaturation curves of  $\alpha$ LA (10  $\mu$ M) in the absence (A) and presence (B) of 5 mM CaCl<sub>2</sub>.
